# Supplementary material
Source: Springer Nature journal article supplement (https://www.springermedizin.de/resource/supplementary/12936_2009_1112_MOESM3_ESM.pdf/9549688)

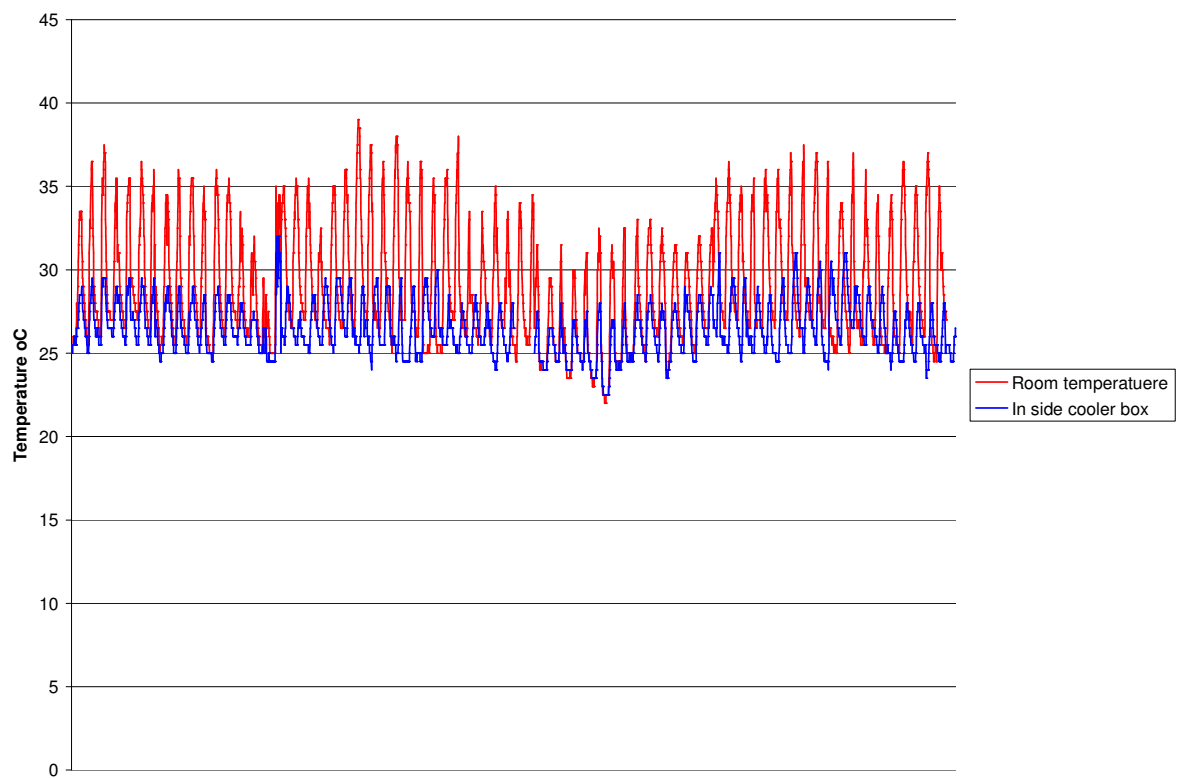

Supplement: MOESM3 [file 9549688]
